# Supplementary material
Source: PubMed Central journal article supplement (PMC8410876)

# Phenotypes of atopic dermatitis: development cohort, imputed dataset 1

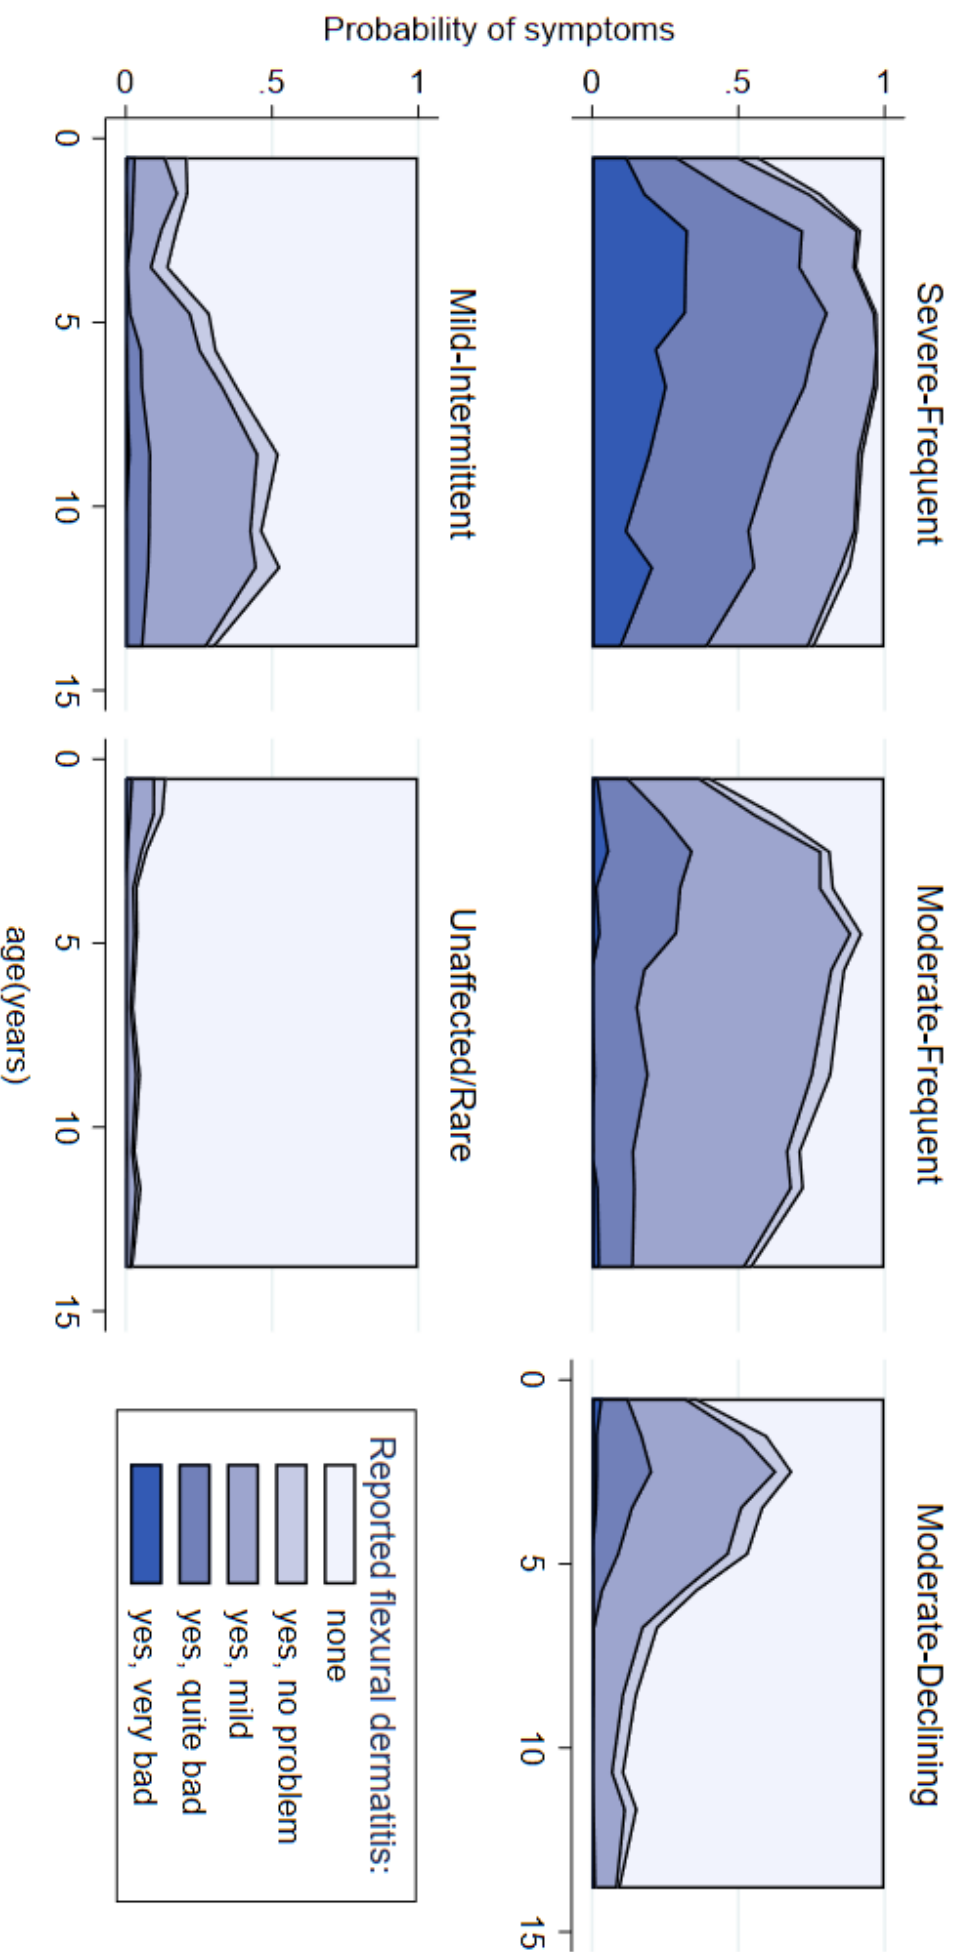

# Phenotypes of atopic dermatitis: development cohort, imputed dataset 2

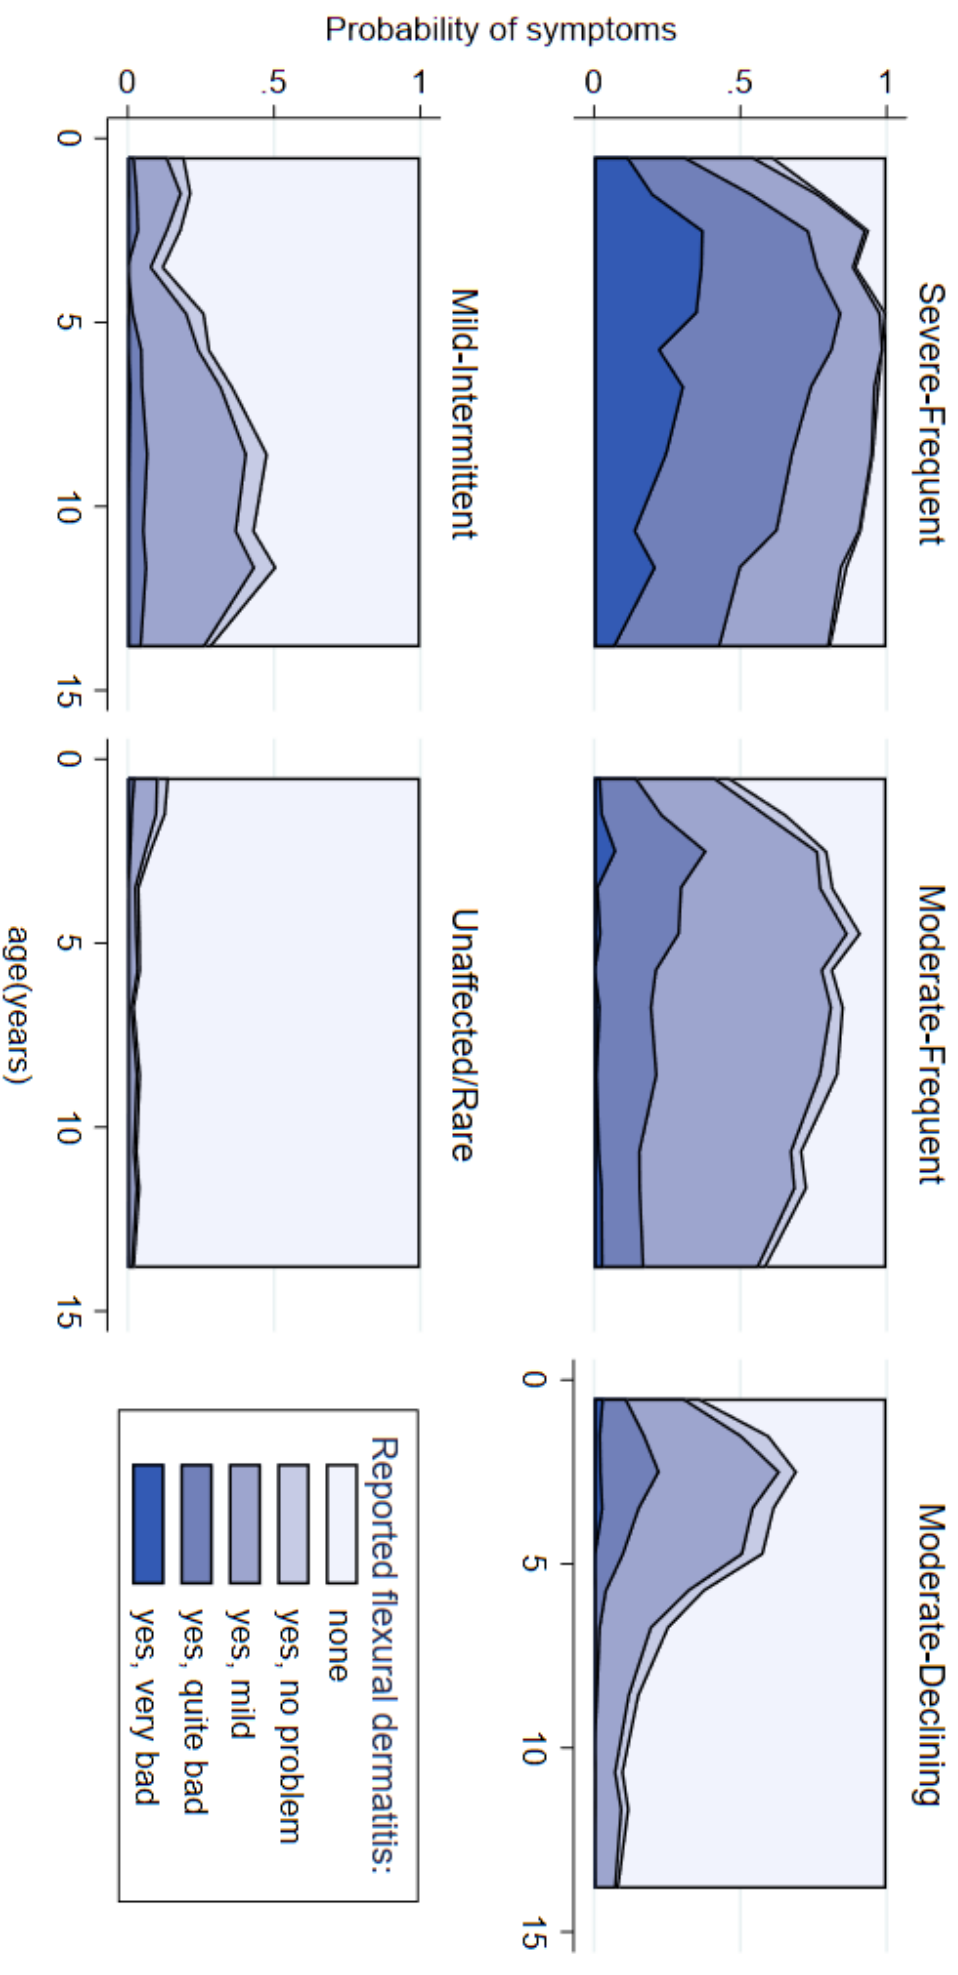

# Phenotypes of atopic dermatitis: development cohort, imputed dataset 3

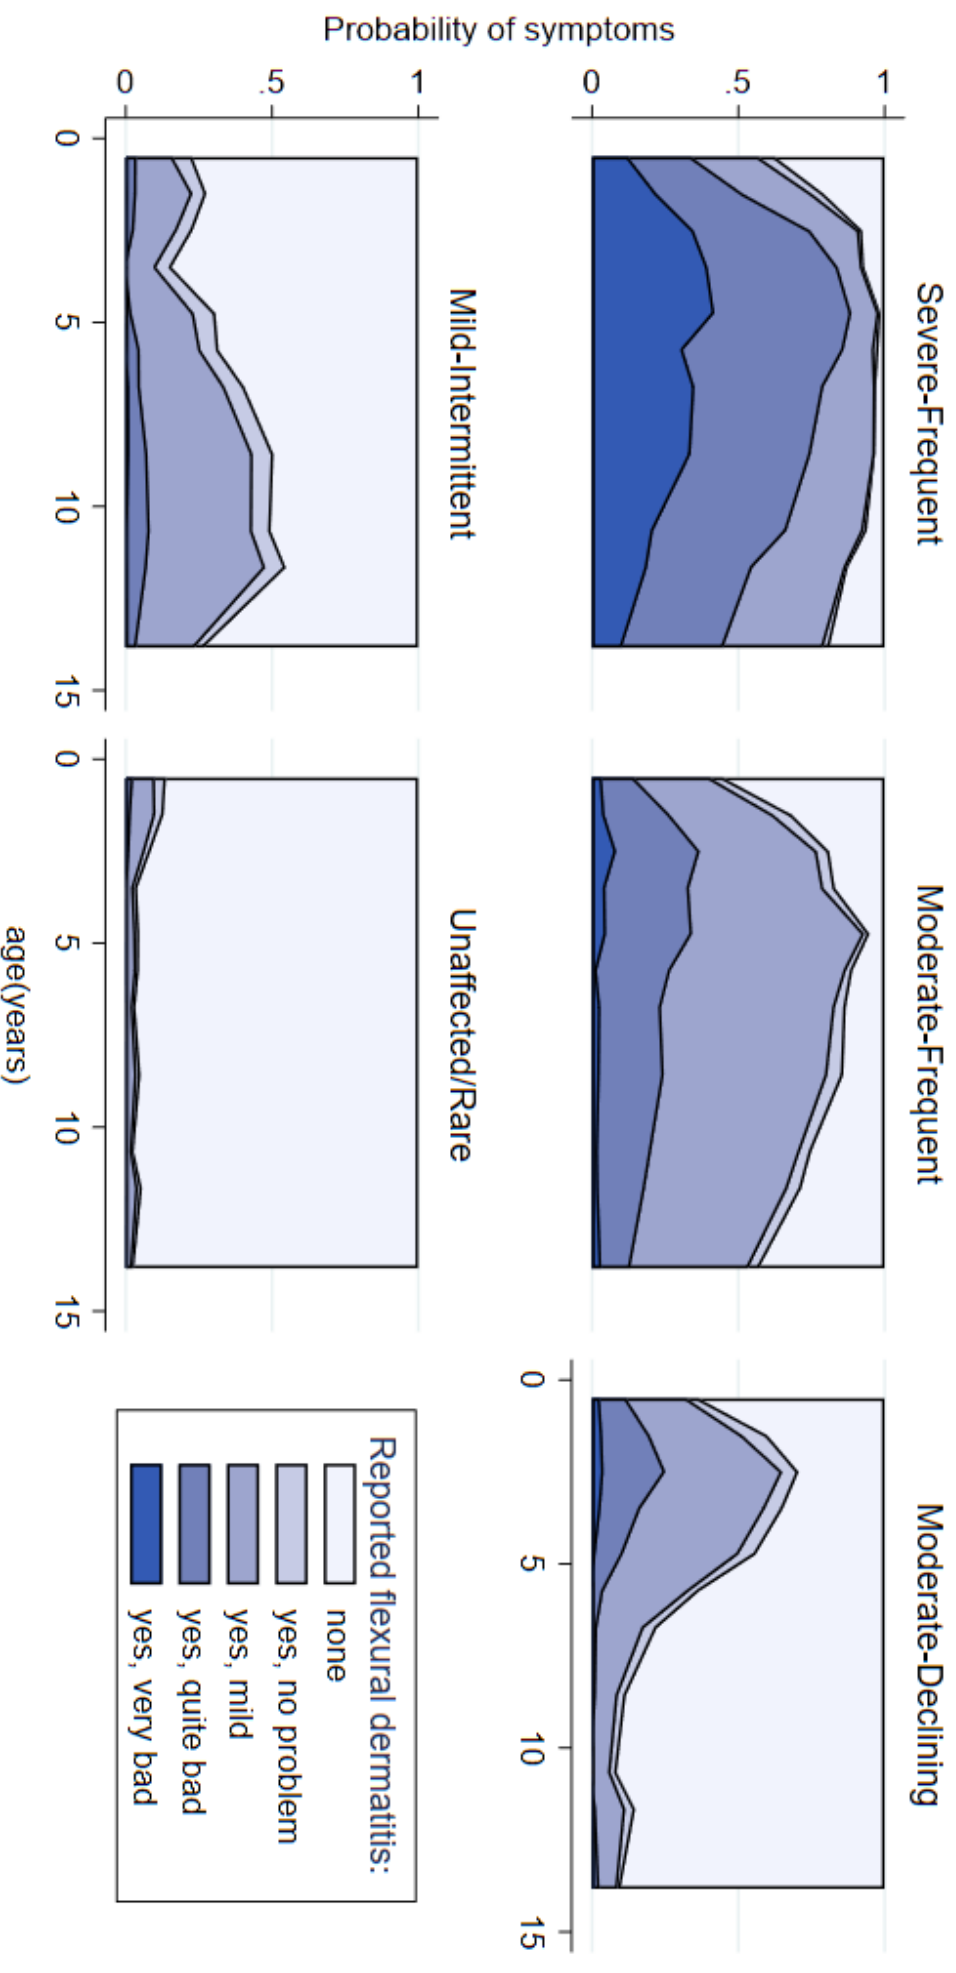

# Phenotypes of atopic dermatitis: development cohort, imputed dataset 4

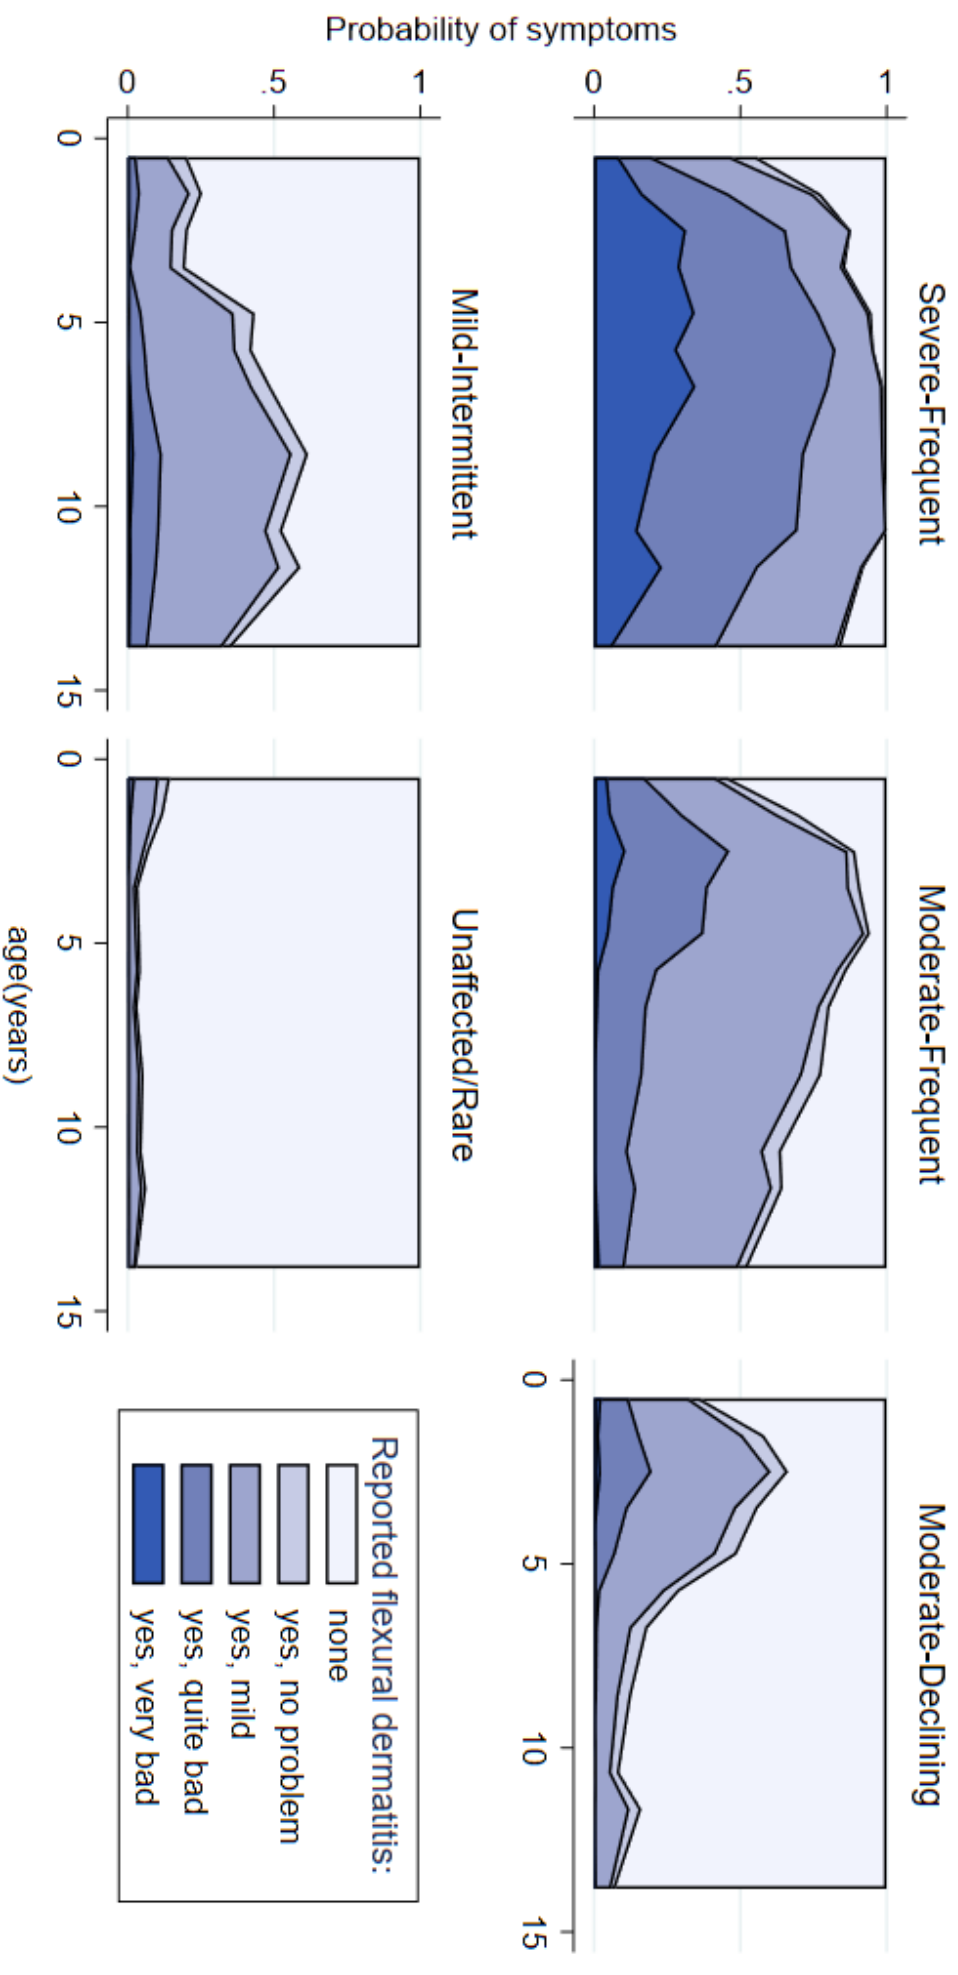

# Phenotypes of atopic dermatitis: development cohort, imputed dataset 5

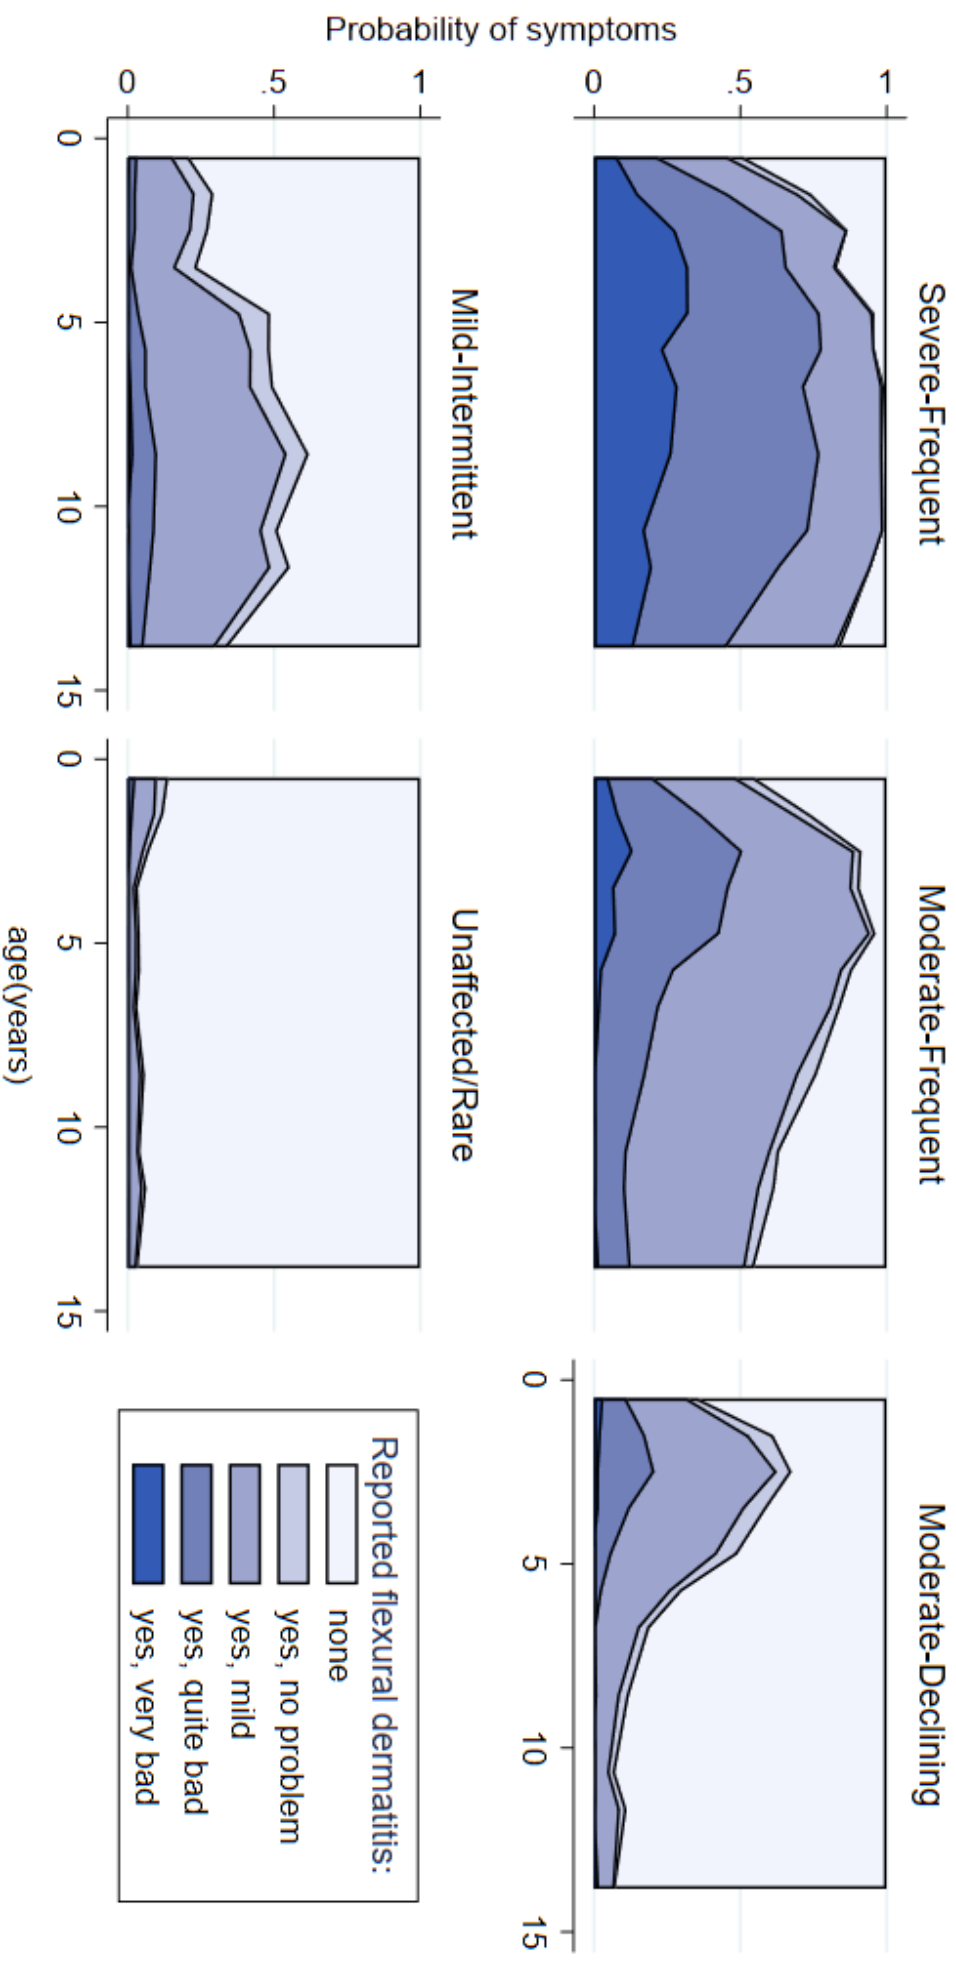

# Phenotypes of atopic dermatitis: development cohort, imputed dataset 6

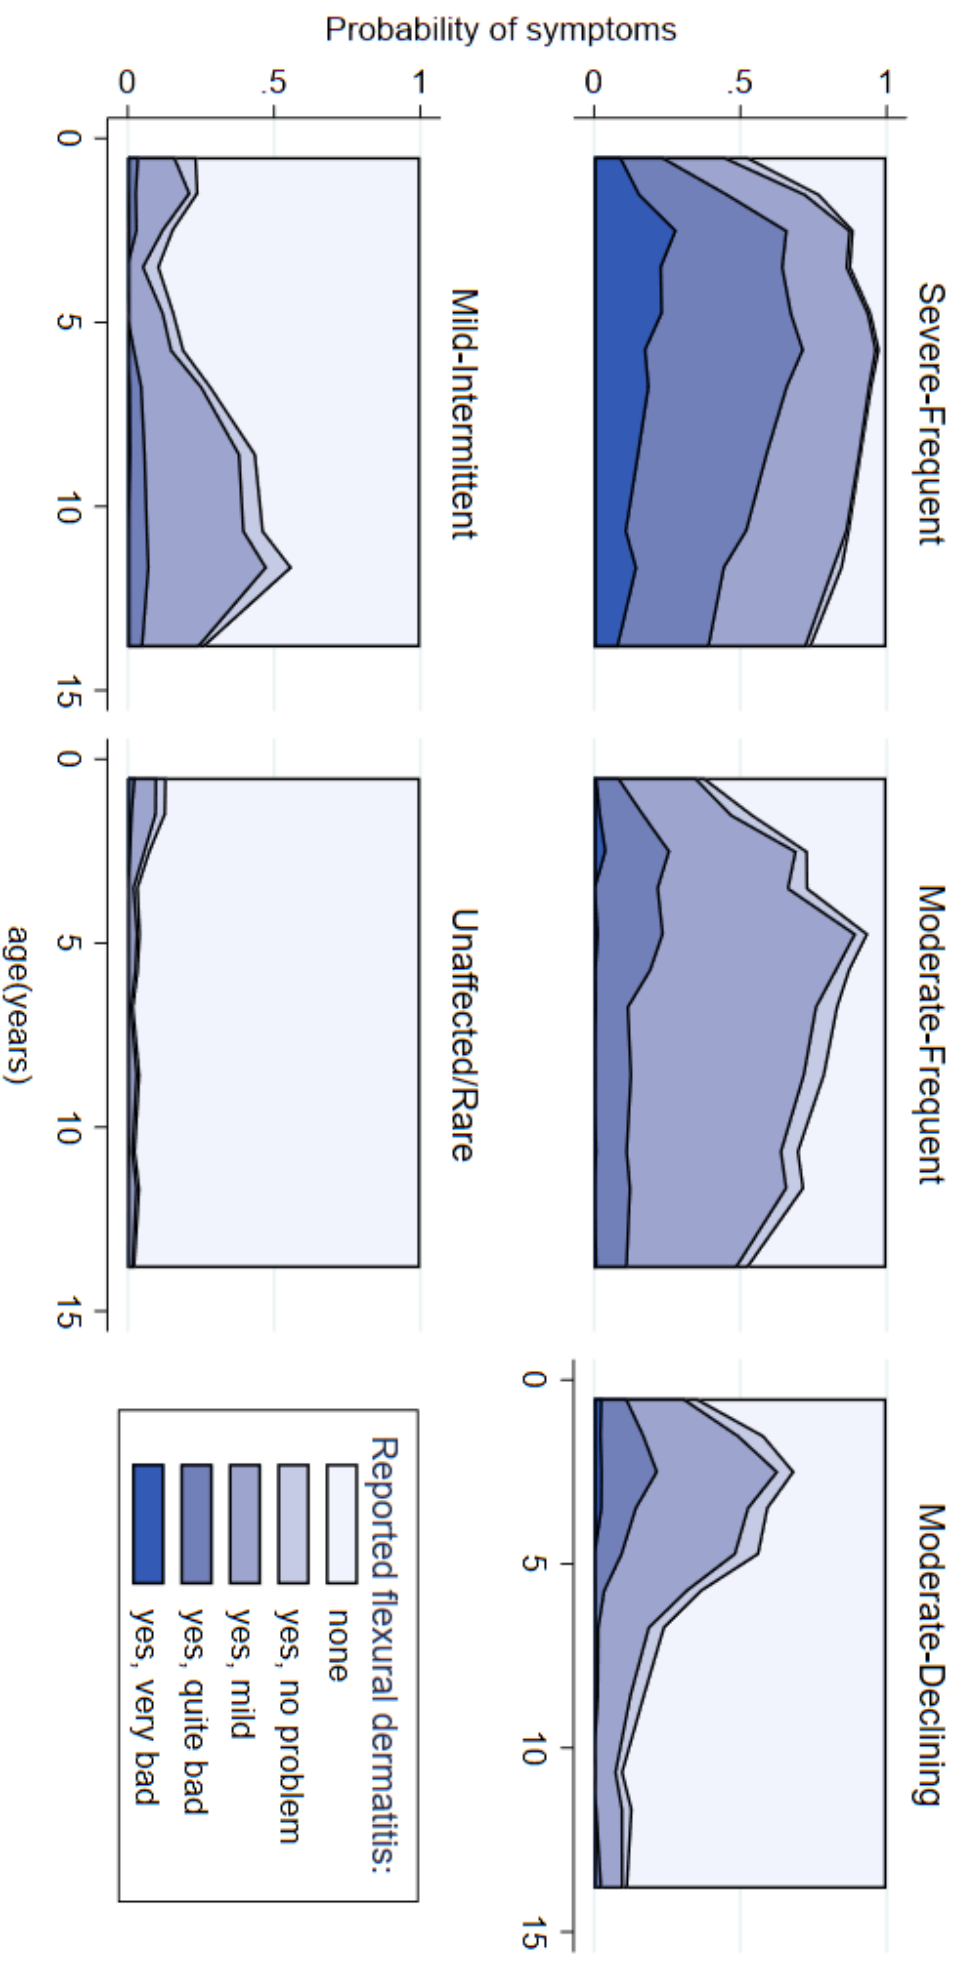

# Phenotypes of atopic dermatitis: development cohort, imputed dataset 7

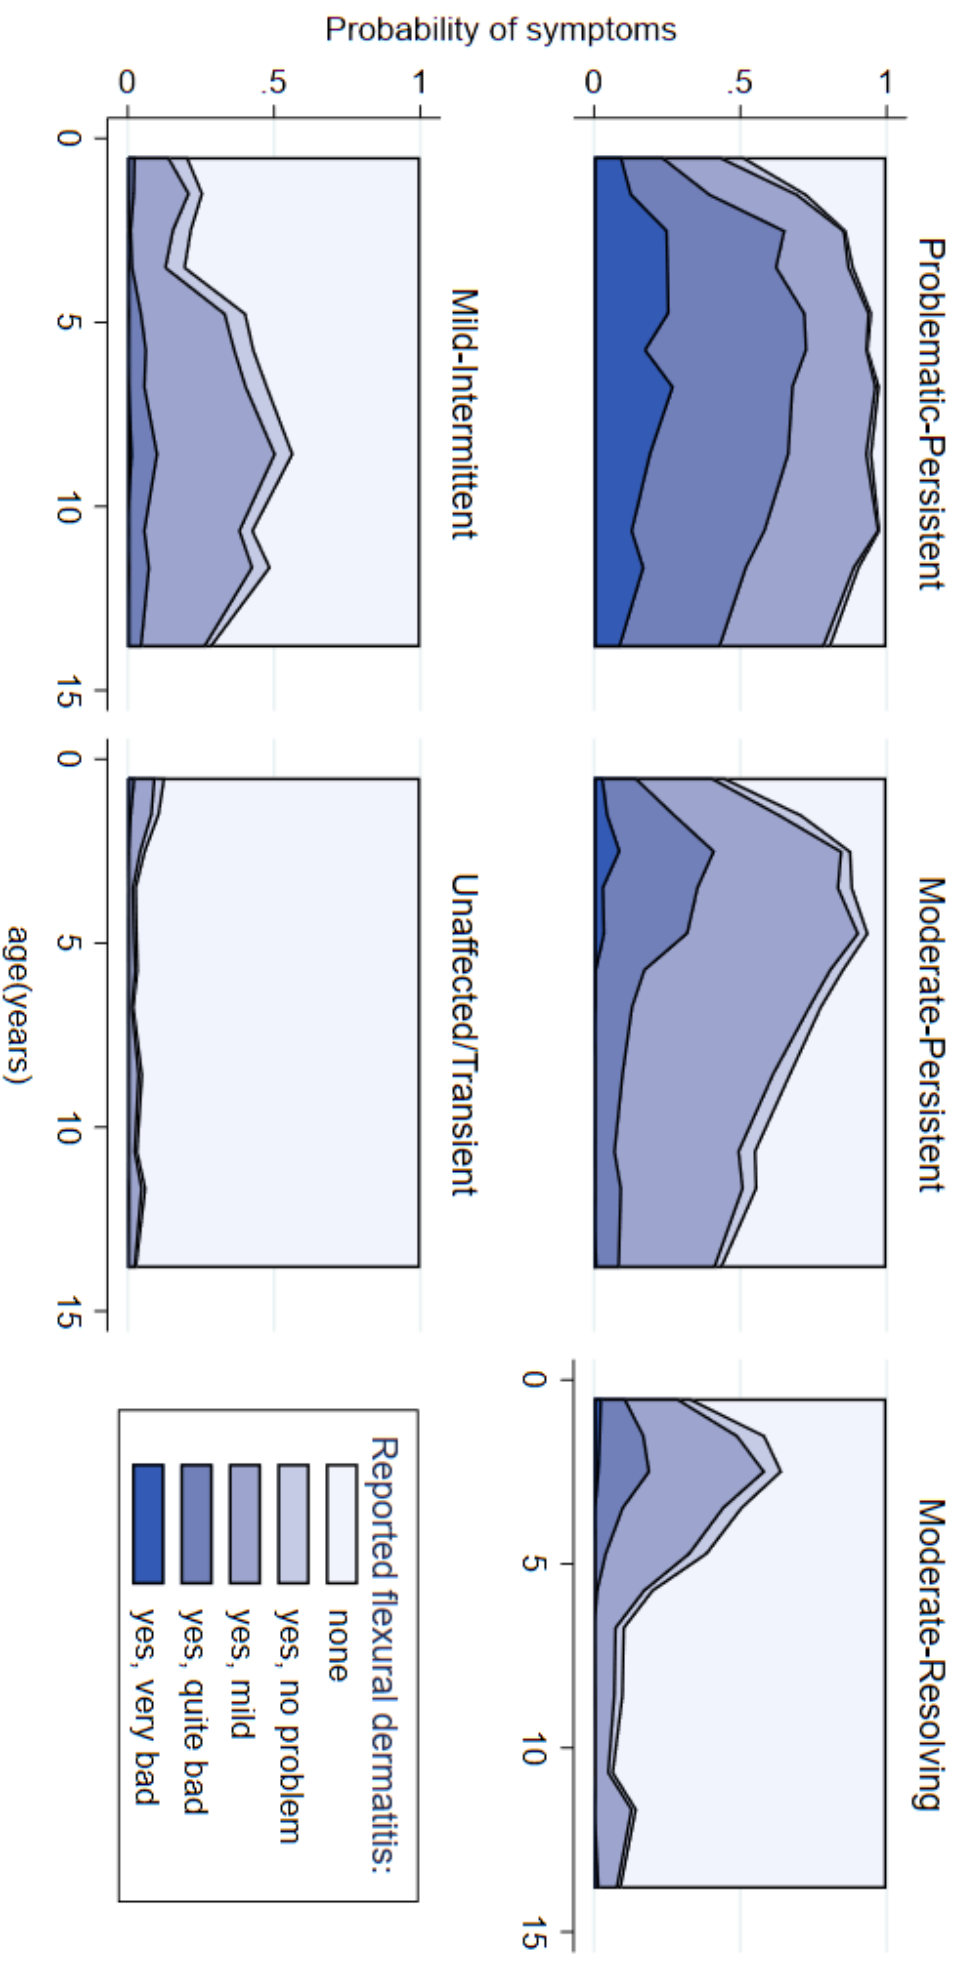

# Phenotypes of atopic dermatitis: development cohort, imputed dataset 8

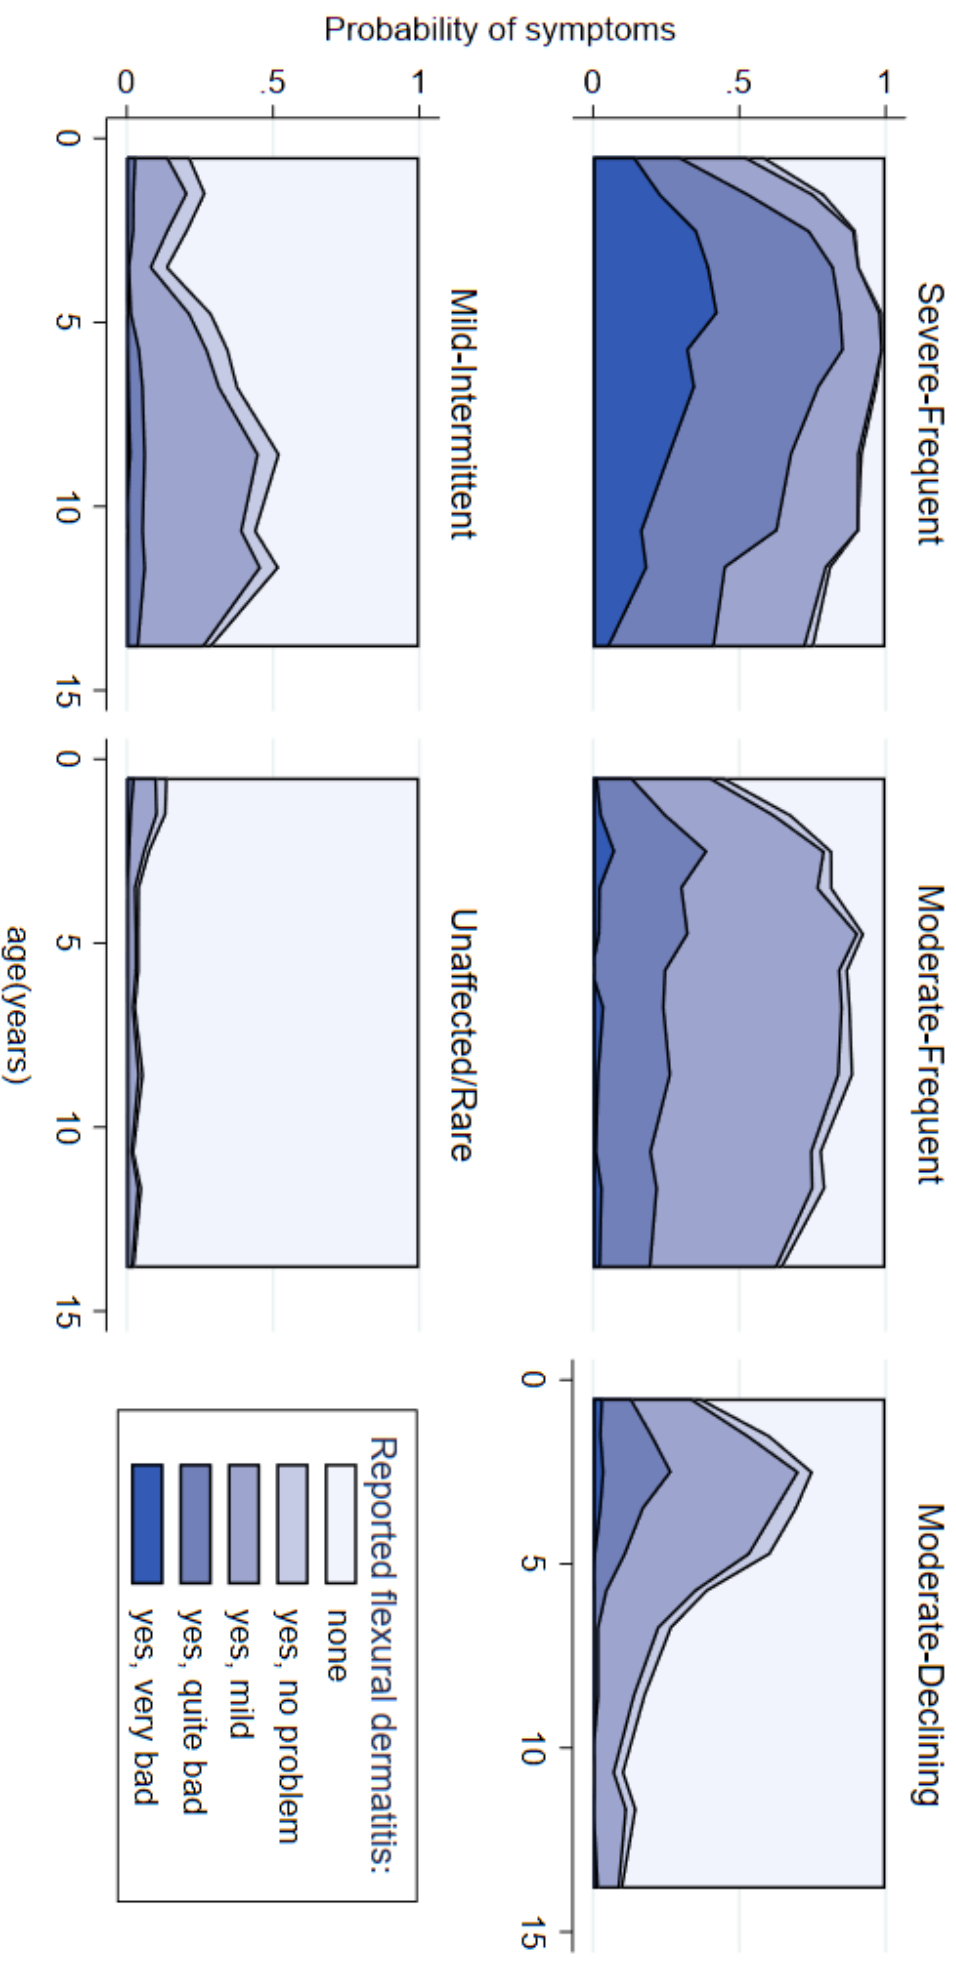



# Phenotypes of atopic dermatitis: development cohort, imputed dataset 9

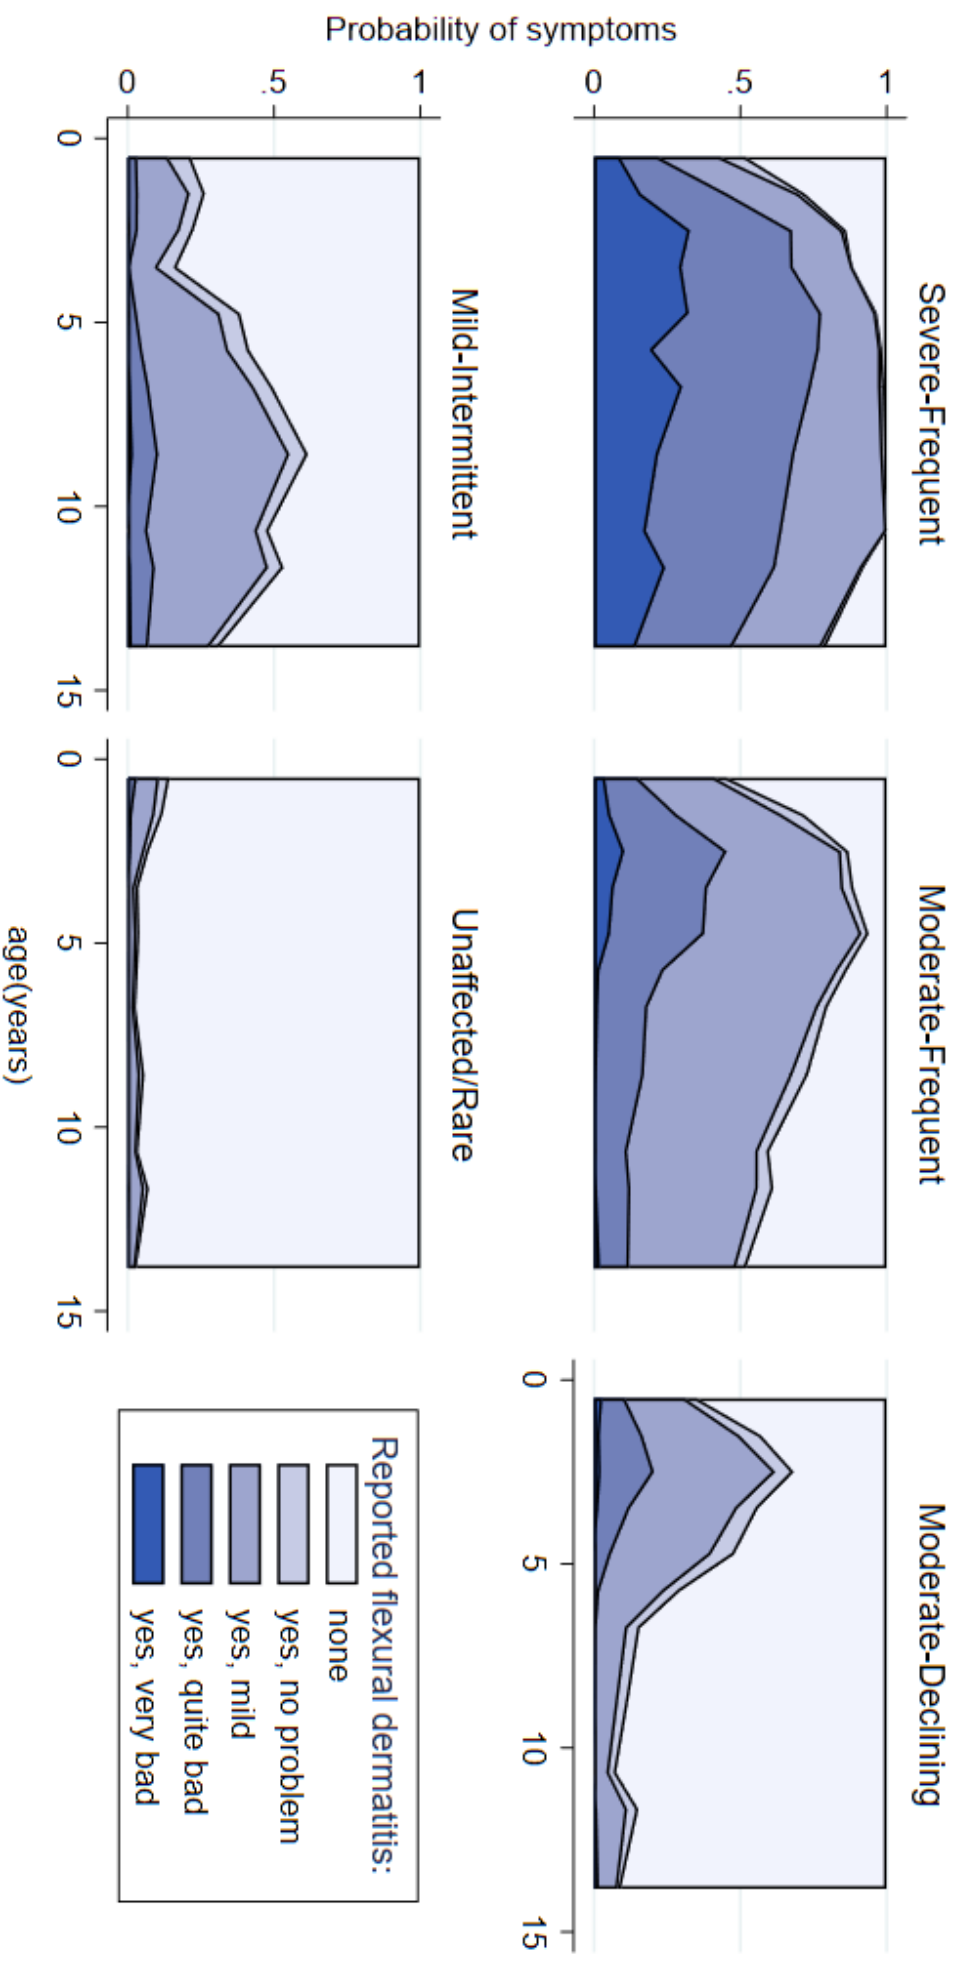

# Phenotypes of atopic dermatitis: development cohort, imputed dataset 10

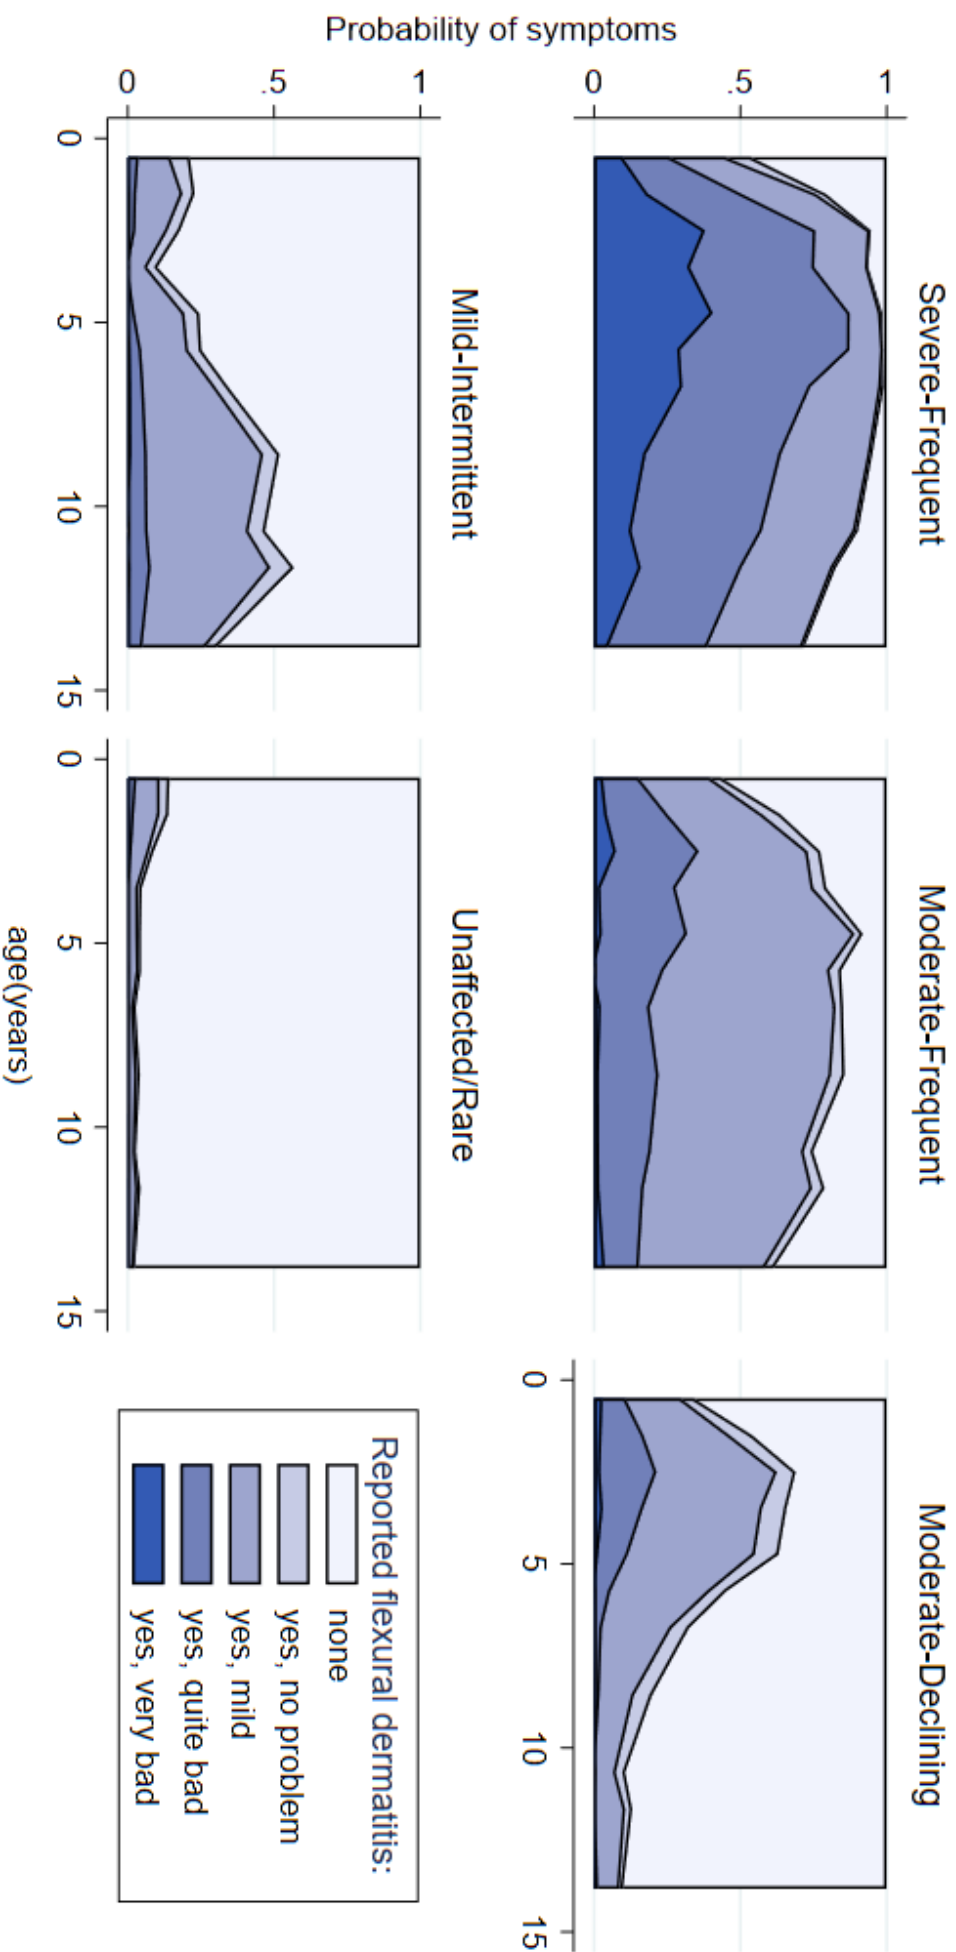

# Phenotypes of atopic dermatitis (development cohort, complete cases)

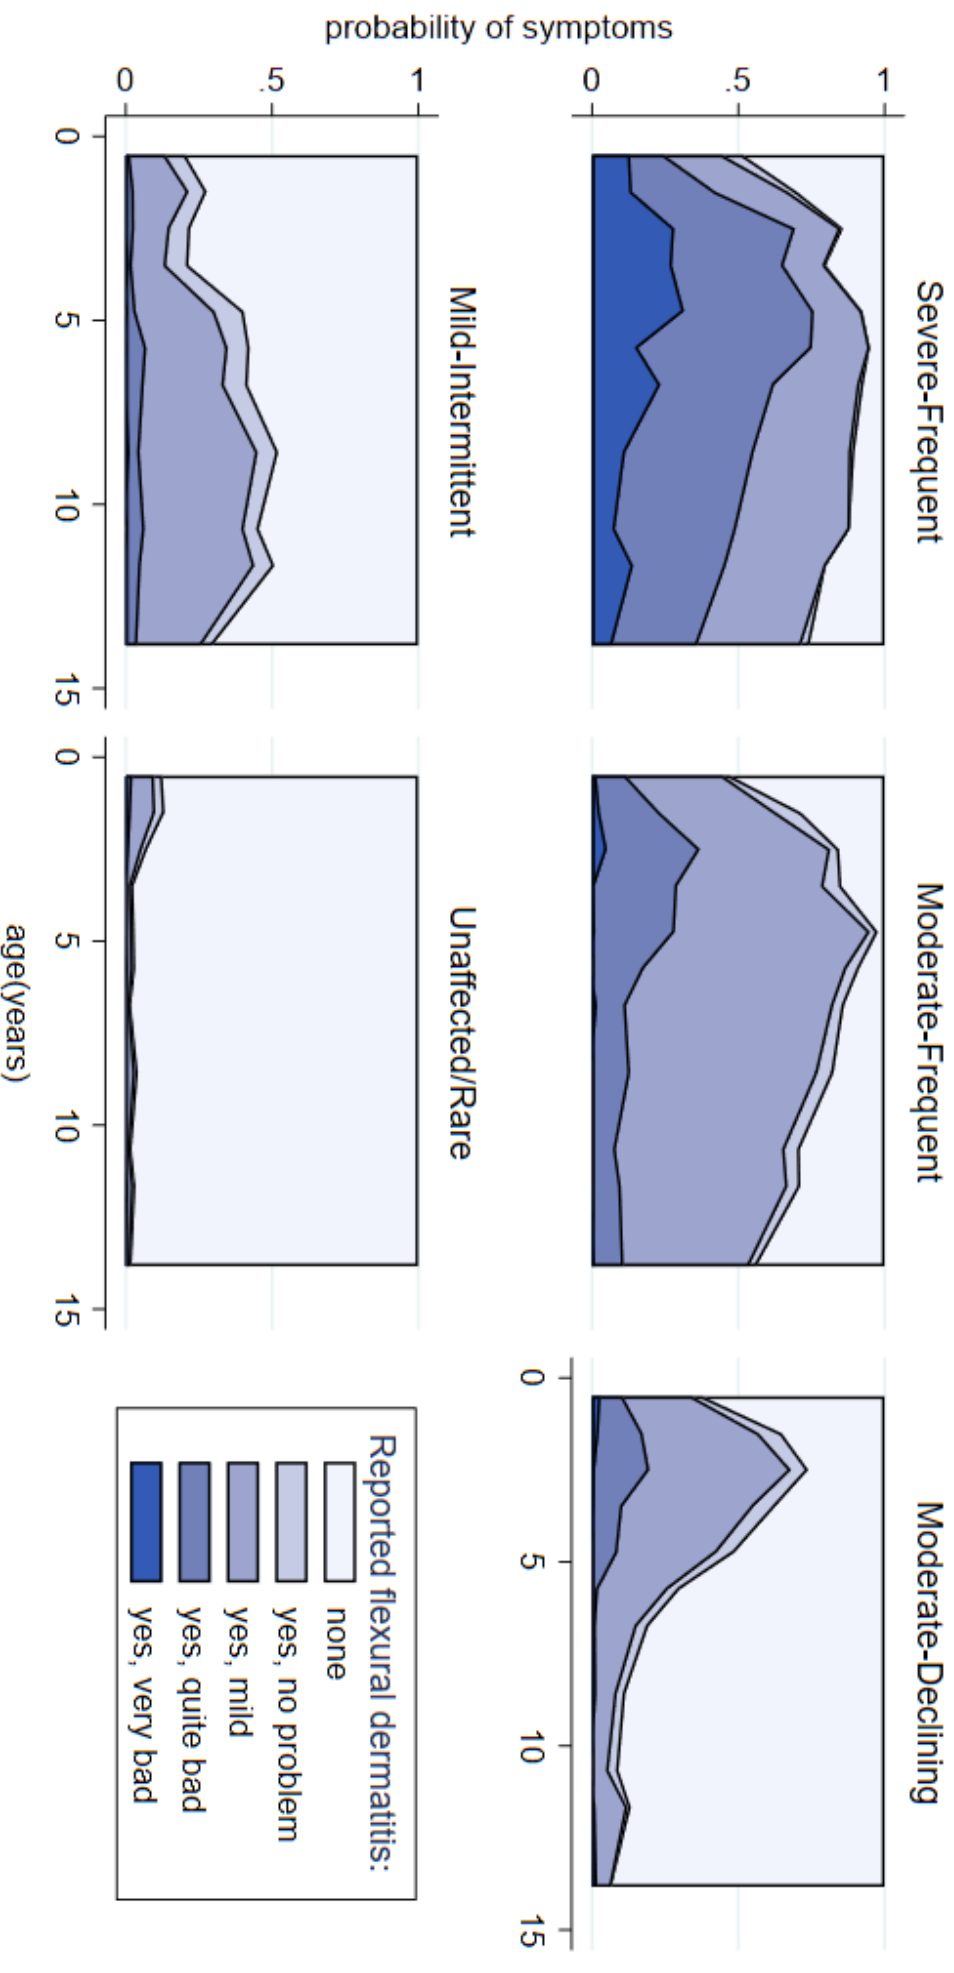

# Phenotypes of atopic dermatitis (validation cohort)

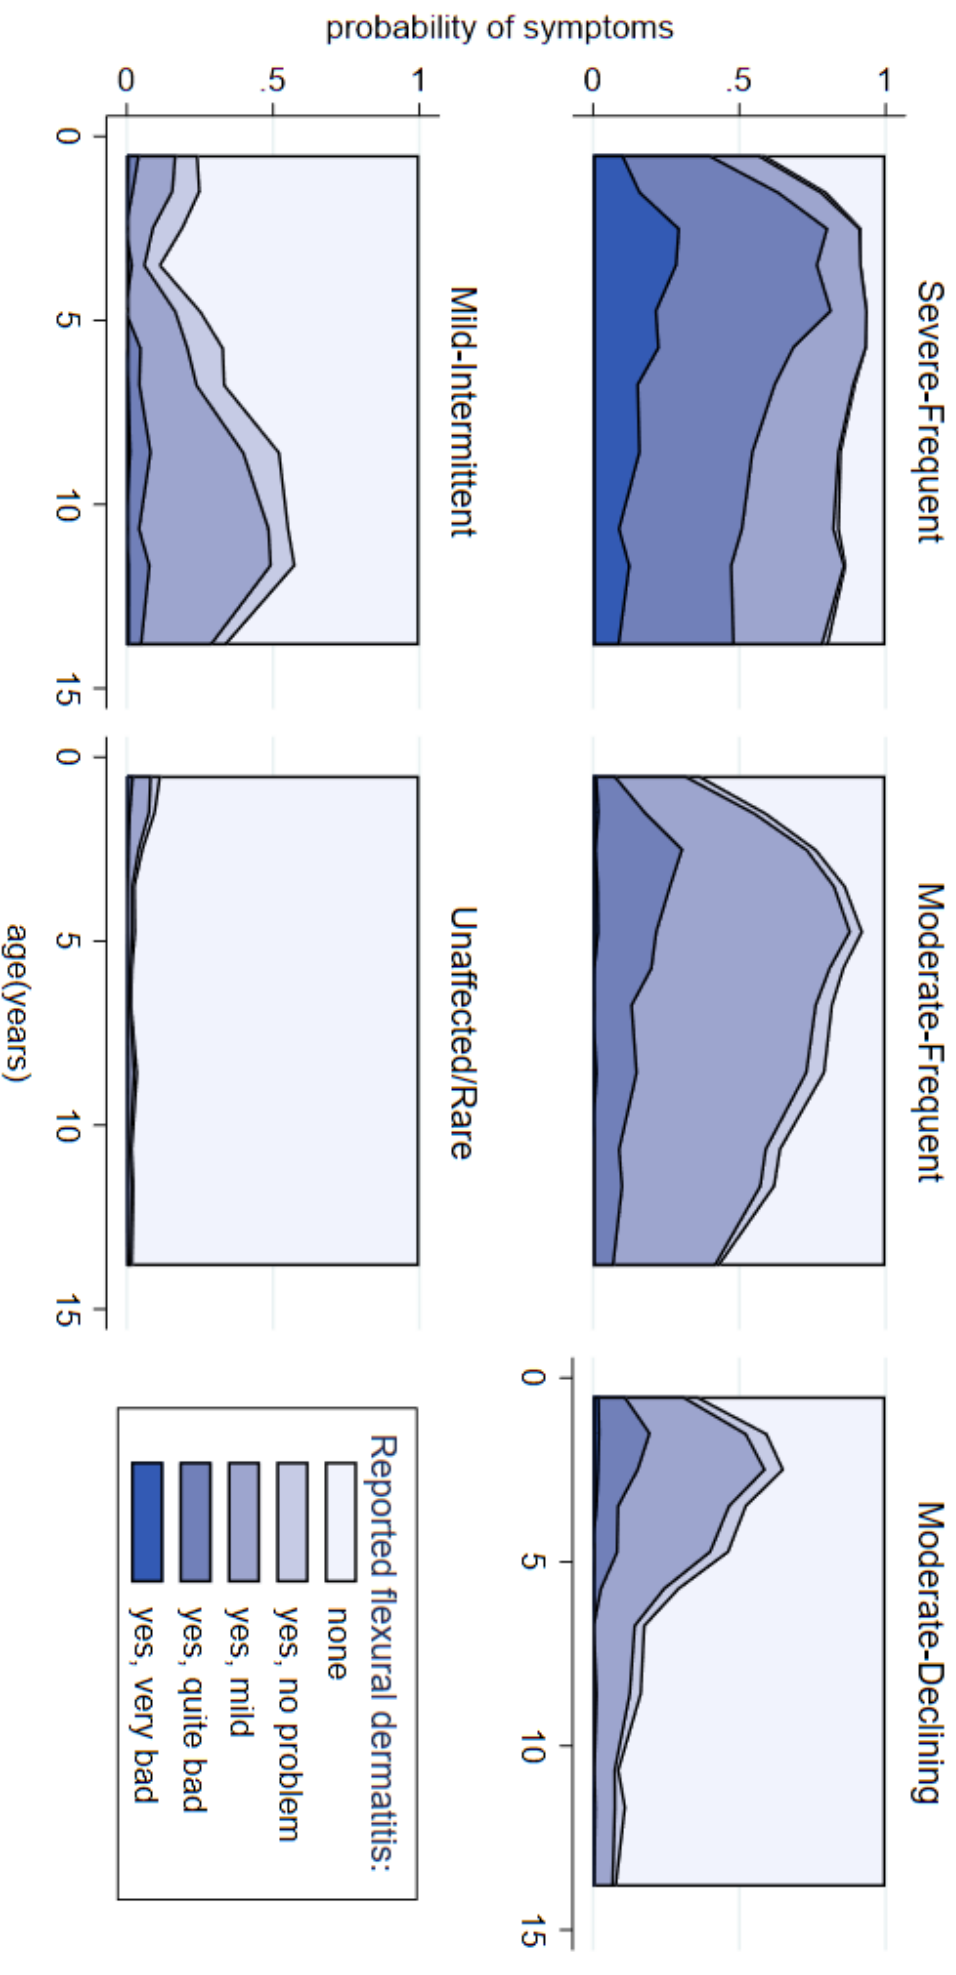

# Phenotypes of atopic dermatitis (validation cohort, complete cases)

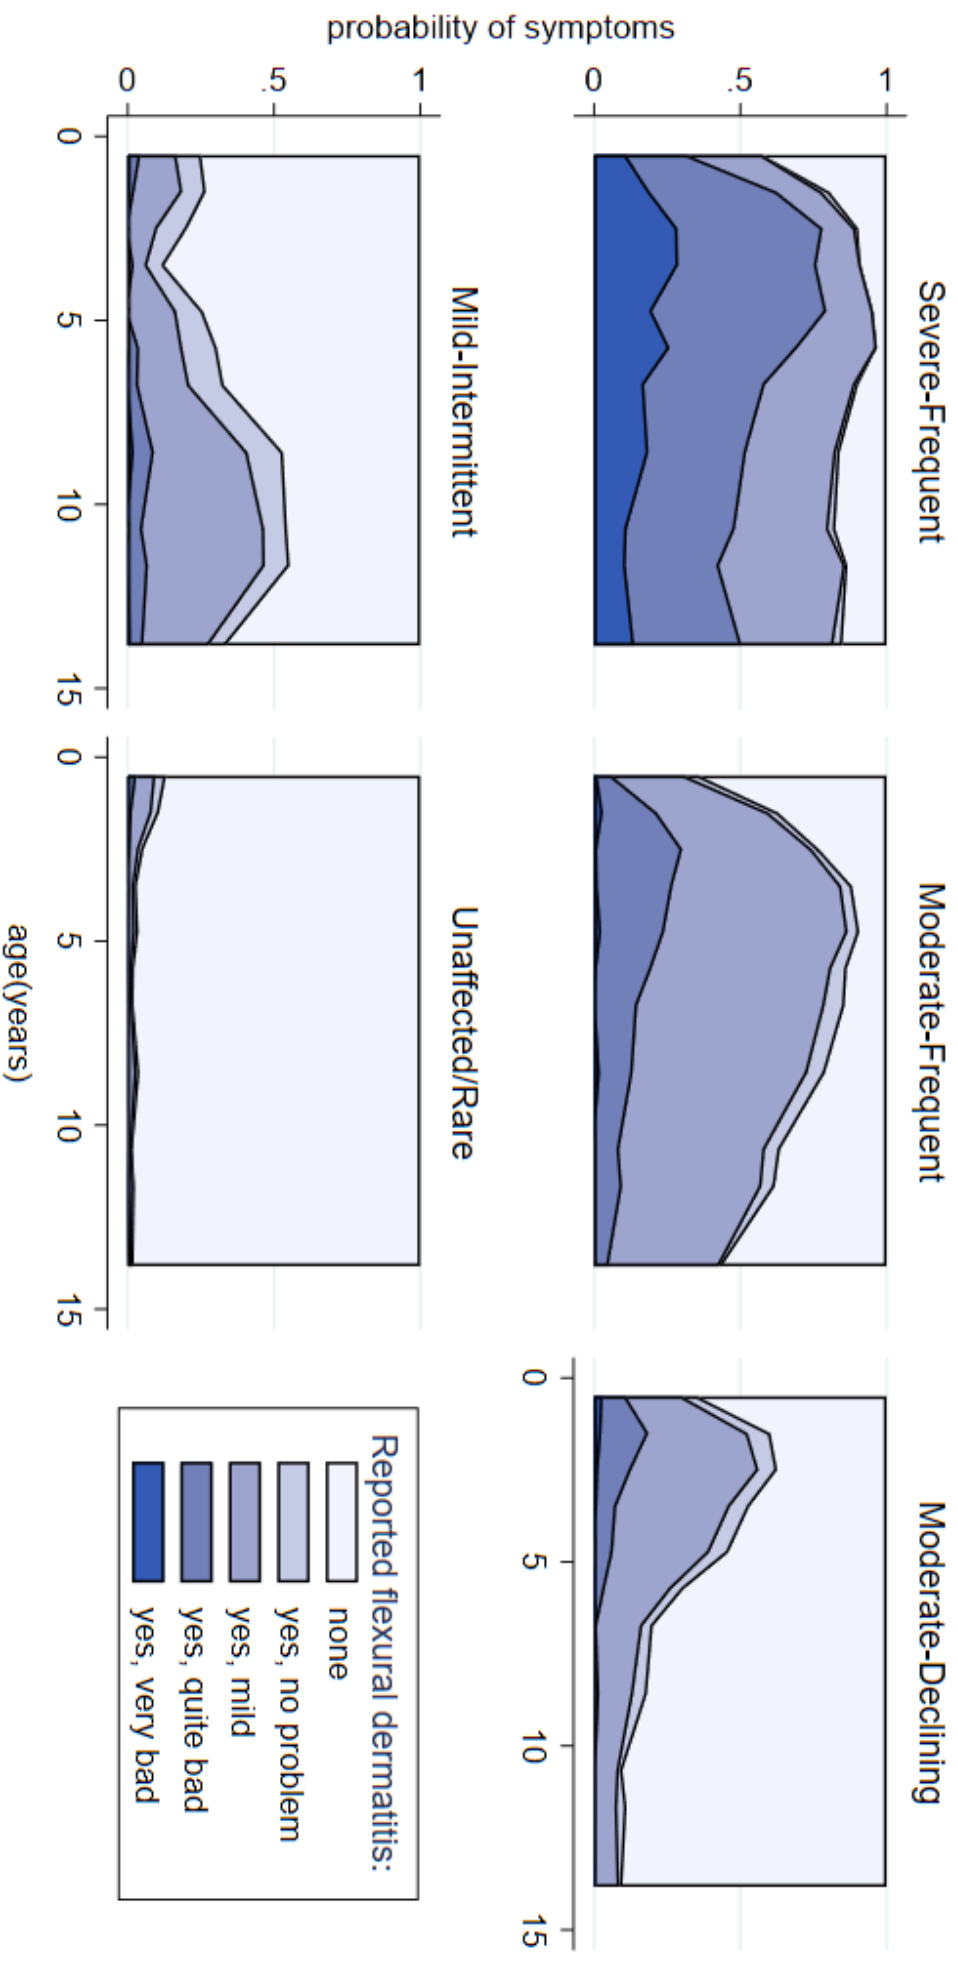

Supplement: NIHMS1696258-supplement-Figure_S5.pdf [file NIHMS1696258-supplement-Figure_S5.pdf]
